1 **FALSE-NEGATIVE RESULTS OF INITIAL RT-PCR ASSAYS FOR COVID-19: A SYSTEMATIC REVIEW**

2

3 **AUTHORS**

4 Ingrid Arevalo-Rodriguez, MSc, PhD<sup>1</sup>; Diana Buitrago-Garcia, MSc<sup>2</sup>, Daniel Simancas-Racines, MD,  
5 PhD<sup>3</sup>, Paula Zambrano-Achig, MSc<sup>4</sup>, Rosa Del Campo, MSc, PhD<sup>5</sup>, Agustín Ciapponi, MD, PhD<sup>6</sup>, Omar  
6 Sued, MD<sup>7</sup>, Laura Martínez-García, MSc<sup>8</sup>, Anne Rutjes, PhD<sup>9</sup>, Nicola Low, PhD<sup>10</sup>, Jose A Perez-Molina,  
7 MD, PhD<sup>11</sup>, Javier Zamora, MSc, PhD<sup>12,13</sup>

8

- 9 1. Clinical Biostatistics Unit, Hospital Universitario Ramón y Cajal, IRYCIS, CIBER of  
10 Epidemiology and Public Health, Madrid, Spain.
- 11 2. Institute of Social and Preventive Medicine (ISPM), University of Bern, Switzerland.
- 12 3. Centro de investigación en Salud Pública y Epidemiología Clínica (CISPEC). Facultad de  
13 Ciencias de la Salud “Eugenio Espejo”, Universidad UTE, Ecuador.
- 14 4. Centro de investigación en Salud Pública y Epidemiología Clínica (CISPEC). Facultad de  
15 Ciencias de la Salud “Eugenio Espejo”, Universidad UTE, Ecuador.
- 16 5. Department of Microbiology, Ramón y Cajal University Hospital, Ramón y Cajal Health  
17 Research Institute (IRYCIS), Madrid, Spain.
- 18 6. Instituto de Efectividad Clínica y Sanitaria (IECS-CONICET), Buenos Aires, Argentina
- 19 7. Fundación Huésped, Buenos Aires, Argentina.
- 20 8. Department of Microbiology, Ramón y Cajal University Hospital, Ramón y Cajal Health  
21 Research Institute (IRYCIS), CIBER of Epidemiology and Public Health, Madrid, Spain.
- 22 9. Institute of Social and Preventive Medicine (ISPM), University of Bern, Switzerland.
- 23 10. Institute of Social and Preventive Medicine (ISPM), University of Bern, Switzerland.
- 24 11. National Referral Centre for Tropical Diseases, Infectious Diseases Department, Hospital

25            Universitario Ramón y Cajal, Insituto Ramón y Cajal de Investgación Sanitaria, Madrid, Spain.

26            12. Clinical Biostatistics Unit, Hospital Universitario Ramón y Cajal, IRYCIS, CIBER of  
27            Epidemiology and Public Health, Madrid, Spain.

28            13. Barts and the London School of Medicine and Dentistry, Queen Mary University London  
29            (UK)

30

31    **Corresponding author:**

32    Ingrid Arevalo-Rodriguez

33    Clinical Biostatistics Unit, Hospital Universitario Ramón y Cajal, IRYCIS

34    CIBER of Epidemiology and Public Health

35    Madrid, Spain

36    Email: [ingrid.arevalo@salud.madrid.org](mailto:ingrid.arevalo@salud.madrid.org)

37    ORCID ID: 0000-0002-7326-4504

38 **ABSTRACT**

39 **Background:** Cases with negative reverse transcription-polymerase chain reaction (RT-PCR) results  
40 at initial testing for suspicion of SARS-CoV-2 infection, and found to be positive in a subsequent test,  
41 are considered as RT-PCR false-negative cases. False-negative cases have important implications for  
42 COVID-19 management, isolation, and risk of transmission. We aimed to review and critically  
43 appraise evidence about the proportion of RT-PCR false-negatives at initial testing for COVID-19.

44 **Methods:** We performed a systematic review and critical appraisal of literature with high  
45 involvement of stakeholders in the review process. We searched on MEDLINE, EMBASE, LILACS, the  
46 WHO database of COVID-19 publications, the EPPI-Centre living systematic map of evidence about  
47 COVID-19, and the living systematic review developed by the University of Bern (ISPM). Two authors  
48 screened and selected studies according to the eligibility criteria and collected data of included  
49 studies (no-independent verification). Risk of bias was assessed using the Quality Assessment of  
50 Diagnostic Accuracy Studies (QUADAS-2) tool. We calculated the false-negative proportion with the  
51 corresponding 95% CI using a multilevel mixed-effect logistic regression model using STATA 16®.  
52 Certainty of the evidence about false-negative cases was rated using the GRADE approach for tests  
53 and strategies. The information is current up to 6 April 2020.

54 **Findings:** Five studies enrolling 957 patients were included. All studies were affected by several  
55 biases and applicability concerns. Pooled estimation of false-negative proportion was 0.085 (95%  
56 CI= 0.034 to 0.196; tau-squared = 1.08; 95% CI= 0.27 to 8.28; p<0.001); however, this estimation is  
57 highly affected by unexplained heterogeneity, and its interpretation should be avoided. The  
58 certainty of the evidence was judged as very low, due to the risk of bias, indirectness, and  
59 inconsistency issues.

60 **Conclusions:** The collected evidence has several limitations, including risk of bias issues, high  
61 heterogeneity, and concerns about its applicability. Nonetheless, our findings reinforce the need for

62 repeated testing in patients with suspicion of SARS-Cov-2 infection given that up to 29% of patients  
63 could have an initial RT-PCR false-negative result.

64 **Systematic review registration:** Protocol available on OSF website: <https://osf.io/gp38w/>

65

FINAL DRAFT

## 66 BACKGROUND

67 On December 31, 2019, the World Health Organization (WHO) was alerted about a cluster of  
68 pneumonia patients in the city of Wuhan, in China's Hubei province [1]. Chinese authorities  
69 confirmed a week later the outbreak of a novel coronavirus currently called Severe Acute  
70 Respiratory Coronavirus 2 (SARS-CoV-2) [2]. This new virus is the underlying cause of Coronavirus  
71 Disease 2019 (COVID-19), which has become a worldwide public health emergency and reached  
72 pandemic status [3]. By the time of this article's writing, the virus has spread to 212 countries and  
73 territories and has caused over 85,837 deaths worldwide [4].

74 Patients with COVID-19 exhibit respiratory symptoms such as fever, cough, and shortness of breath  
75 as primary manifestations [5, 6]. Although most of the cases present mild symptoms, some cases  
76 have developed pneumonia, severe respiratory diseases, kidney failure and even death [7-9]. SARS-  
77 CoV-2 mainly spreads through person-to-person contact via respiratory droplets from coughing and  
78 sneezing, and through surfaces that have been contaminated with these droplets.[10] Recent  
79 studies have suggested the presence of asymptomatic cases in cluster families, possibly transmitting  
80 the virus before a virus-carrying person displays any symptom [11].

81 Because the signs of infection mentioned above are non-specific, confirmation of cases is currently  
82 based on the detection of a viral sequence by reverse transcription-polymerase chain reaction (RT-  
83 PCR). Different RT-PCR schemes have been proposed; all of them include the N gene that codes for  
84 the viral nucleocapsid. Other alternative targets are the E gene, for the viral envelope, or the S gene  
85 for the spike, and the Hel gene for the RNA polymerase gene (RdRp/Helicase) [12, 13]. Molecular  
86 criteria for *in vitro* diagnosis of COVID-19 disease are heterogeneous, and usually require the  
87 detection of two or more genes of SARS-CoV-2 [14].

88 RT-PCR repeated testing might be required to confirm a clinical diagnosis, especially in the presence  
89 of symptoms close related to COVID-19 disease [15]. Cases with negative RT-PCR results at initial

90 testing and later found to be positive in a subsequent test are commonly considered cases with an  
91 initial false-negative result. Some researchers have suggested that these failures in SARS-CoV-2  
92 detection are related to multiple pre-analytical and analytical factors, such as lack of standardisation  
93 to collect specimens, the time and conservation of samples until to be received in the laboratory,  
94 the use of non-adequately validated assays, contamination during the procedure, insufficient viral  
95 specimens and load, the incubation period of the disease, and the risk of active recombination and  
96 mutation [14, 16].

97 The availability of accurate laboratory tools for COVID-19 is essential for case identification, contact  
98 tracing, and optimization of infection control measures, as it was shown by previous epidemics  
99 caused by SARS-CoV and Middle East respiratory syndrome coronavirus (MERS-CoV) [17-19]. Due  
100 to the COVID-19 pandemic causing an important burden on health systems around the globe, and  
101 considering that a missing COVID 19 case might have severe consequences at several levels, we  
102 aimed to estimate through a systematic review of the literature the proportion of false-negatives  
103 related to the detection of SARS-CoV-2 using RT-PCR assays at the initial laboratory test.

104

## 105 **METHODS**

106 We followed the Preferred Reporting Items for Systematic Reviews and Meta-Analyses (PRISMA) for  
107 diagnostic test accuracy (DTA) to perform this report [20]. For the development of this systematic  
108 review of literature, we used selected methods for the development of rapid reviews, such as a high  
109 involvement of stakeholders in the review process (including the definition of the review question),  
110 a non-independent verification of data selection and extraction, and parallelisation of tasks (that is,  
111 to perform selected activities simultaneously instead of consecutively). Other review shortcuts and  
112 omission of review tasks were not applied. A protocol of this review was published in the Open  
113 Science Framework repository for public consultation (<https://osf.io/gp38w/>).

114 *Criteria for considering studies for this review*

115 We included observational studies (including accuracy studies, cohorts, and case series) reporting  
116 the initial use of RT-PCR to the detection of SARS-CoV-2 RNA in patients under suspicion of infection  
117 by clinical or epidemiological criteria. Specially, we prioritised studies enrolling consecutive patients  
118 who were receiving RT-PCR as initial testing with further confirmation of SARS-CoV-2 infection  
119 and/or COVID-19 diagnosis (positive/negative). We did not impose limits by age, gender, or study  
120 location.

121 We aimed to include all types of RT-PCR kits, regardless of the brand/manufacturer, the RNA  
122 extraction method used, the number of target gene assays assessed and cycle threshold value for  
123 positivity. Studies comparing the accuracy of two or more tests for COVID-19 diagnosis were also  
124 considered if we could abstract the fraction of negative test results as defined by an initial RT-PCR  
125 assay.

126 We excluded studies without clear information about false-negative cases, the number of final  
127 confirmed cases, or an unclear verification of negative cases. Case reports, studies based on  
128 laboratory samples, and literature reviews were also excluded.

129 *Search methods for identification of studies*

130 We carried out a comprehensive and sensitive search strategy based on the proposal for the living  
131 systematic review developed by the University of Bern's Institute of Social and Preventive Medicine-  
132 ISPM in the following databases:

- 133 • MEDLINE (Ovid SP, 1946 to April 6<sup>th</sup>, 2020)
- 134 • Embase (Ovid SP, 1982 to April 6<sup>th</sup>, 2020)
- 135 • LILACS (iAH English) (BIREME, 1982 to April 6<sup>th</sup>, 2020)

136 We did not apply any language restrictions to electronic searches (S1 Appendix). As additional  
137 sources of potential studies, we searched in repositories of preprint articles (such as Medrxiv),

138 clinical trials registries for ongoing or recently completed trials (clinicaltrials.gov; the World Health  
139 Organization's International Trials Registry and Platform, and the ISRCTN Registry), and the  
140 reference lists of all relevant papers. Finally, we also screened the following resources for additional  
141 information:

- 142 • The WHO Database of publications on coronavirus disease (COVID-19). Available on  
143 [https://www.who.int/emergencies/diseases/novel-coronavirus-2019/global-research-on-](https://www.who.int/emergencies/diseases/novel-coronavirus-2019/global-research-on-novel-coronavirus-2019-ncov)  
144 [novel-coronavirus-2019-ncov.](https://www.who.int/emergencies/diseases/novel-coronavirus-2019/global-research-on-novel-coronavirus-2019-ncov)
- 145 • The Living systematic map of the evidence about COVID-19 produced by EPPI-Centre.  
146 Available on:  
147 [http://eppi.ioe.ac.uk/cms/Projects/DepartmentofHealthandSocialCare/Publishedreviews/](http://eppi.ioe.ac.uk/cms/Projects/DepartmentofHealthandSocialCare/Publishedreviews/COVID19Livingssystematicmapoftheevidence/tabid/3765/Default.aspx)  
148 [COVID19Livingssystematicmapoftheevidence/tabid/3765/Default.aspx](http://eppi.ioe.ac.uk/cms/Projects/DepartmentofHealthandSocialCare/Publishedreviews/COVID19Livingssystematicmapoftheevidence/tabid/3765/Default.aspx)
- 149 • The Living systematic review developed by the Institute of Social and Preventive Medicine-  
150 ISPM from the University of Bern available on <https://ispmbern.github.io/covid-19/>

#### 151 *Data collection and analysis*

152 For the selection of potential studies, one reviewer screened the search results based on the title  
153 and abstract, with additional verification by a second reviewer (no-independent verification). We  
154 retrieved the full-text copy of each study assessed as potentially eligible, and pairs of reviewers  
155 confirmed eligibility according to the selection criteria (non-independent verification). In case of  
156 disagreements we reached consensus by discussion. For data extraction one reviewer extracted  
157 qualitative and quantitative data from eligible studies. An additional reviewer checked all the  
158 extracted information for accuracy (non-independent verification of data extraction).

#### 159 *Assessment of methodological quality*

160 We assessed the methodological quality of accuracy studies using the Quality Assessment of  
161 Diagnostic Accuracy Studies (QUADAS-2) tool [21]. Due to the lack of tools to assess the risk of bias



162 associated with case series, we decided to apply the QUADAS-2 tool in case of inclusion of this type  
163 of report.

#### 164 *Statistical analysis and data synthesis*

165 For all included studies, we extracted data about the number of cases initially considered as negative  
166 (i.e. false-negative cases) as well as the total of confirmed cases in further investigations. We  
167 presented the results of estimated proportions (with 95% CIs) in a forest plot, in order to assess the  
168 between-study variability. We aimed to calculate the false-negative rate with the corresponding  
169 95% CI using a multilevel mixed-effect logistic regression model implemented in Stata 16®'s  
170 `metaprop_one` command. This allowed us to estimate the between-study heterogeneity from the  
171 variance of study-specific random intercepts. We assessed the heterogeneity between the results  
172 of the primary studies using the Tau-square statistic. A probability value less than 0.1 ( $p < 0.1$ ) was  
173 considered to suggest statistically significant heterogeneity and preclude a pooled result of  
174 numerical data.

175 We planned to investigate the potential sources of heterogeneity using a descriptive approach and  
176 performing a random-effects meta-regression analysis. Anticipated sources of heterogeneity  
177 included the type of specimen collected, the presence or not of clinical findings, the number of RNA  
178 targets genes under assessment, and the time of symptom evolution.

#### 179 *Summary of findings and certainty of the evidence*

180 We rated the certainty of the evidence about false-negative cases following the GRADE approach  
181 for tests and strategies [22, 23]. We assessed the quality of evidence as high, moderate, low or very  
182 low, depending on several factors including risk of bias, imprecision, inconsistency, indirectness, and  
183 publication bias. We illustrate the consequences of the numerical findings in a population of 100  
184 tested, according to three different prevalence estimates of the disease provided by the  
185 stakeholders involved in this review.

186 *Patient and public involvement*

187 We involved several stakeholders in the design, conduct, and reporting of our research, including  
188 general and family physicians, specialists on infectious disease and microbiologists currently  
189 attending patients under suspicion of COVID 19 disease. The study protocol and preliminary results  
190 are publicly available on <https://osf.io/gp38w/>.

191

192 **RESULTS**

193 Electronic searches yielded 662 references from selected databases. In addition, we obtained 186  
194 additional references searching in other resources (Figure 1). Our initial screening of titles and  
195 abstracts identified 61 references to assess in full text. We excluded 54 studies due to: a) case  
196 reporting fewer than five patients; b) unclear information about the results of initial RT-PCR and/or  
197 false-negatives; c) reviews and state-of-art; d) other reasons (S2 Appendix). Two studies were not  
198 available in full-text despite requests to their authors. We included five studies in qualitative and  
199 quantitative synthesis [24-28] which included 957 patients.

200 The sample size ranged from 36 to 601 confirmed cases (median 102 patients). All included studies  
201 were in pre-print status. Three studies were focused on accuracy estimations [24, 26, 27], while two  
202 additional studies reported information of a case series [25, 28]. Data collection of cases ranged  
203 from January 6 to February 8-2020. All studies were performed in institutions based in China (Figure  
204 2). The age of participants ranged from 44 to 51 years (information derived from three studies) [24,  
205 25, 27]. There were 577 men versus 213 women included (Table 1). Three studies included patients  
206 under suspicion of COVID-19 due to clinical findings and/or epidemiological criteria [24, 26, 27].  
207 Confirmation of infection was performed after isolation of SARS-CoV-2 in any real-time RT-PCR assay  
208 for 2019-nCoV, including repeated RT-PCR after negative results (two or more). Three studies  
209 provided information about the proportion of confirmed cases with positive chest CT findings,

210 ranging from 74 to 98%. One study provided information about the time from the symptom onset  
211 to CT scan as a proxy for the duration of disease [25], and a second one reported duration of fever  
212 [27].

213 Regarding RT-PCR testing, the RT-PCR brand/manufacturer was reported by two studies [24, 25], No  
214 studies reported criteria for positivity. Most of the studies based their assessment on throat  
215 samples, such as pharyngeal, nasal and oropharyngeal swabs. Four studies provided information  
216 about the time since the initial RT-PCR to repeated testing (Table 1).

FINAL DRAFT

217 **Table 1.** Characteristics of included studies

| ID              | Data collection          | Setting                                                                                                                                                    | Age (years)                               | N total (male: female) | Type of specimen                                                                          | RT-PCR Brand                                                                                                                         | Days from symptoms onset (days)                 | Interval between initial RT-PCR to additional RT-PCRs                                       |
|-----------------|--------------------------|------------------------------------------------------------------------------------------------------------------------------------------------------------|-------------------------------------------|------------------------|-------------------------------------------------------------------------------------------|--------------------------------------------------------------------------------------------------------------------------------------|-------------------------------------------------|---------------------------------------------------------------------------------------------|
| Ai T 2020       | January 6 to February 6  | Tongji Hospital of Tongji Medical College of Huazhong University of Science and Technology, Wuhan, Hubei, China                                            | Mean 51 ± 15<br>Range of 2 to 95          | 601 (467:134)          | Throat swab                                                                               | TaqMan One-Step RT-PCR Kits from Shanghai Huirui Biotechnology Co., Ltd or Shanghai BioGerm Medical Biotechnology Co., Ltd,          | Not reported                                    | Median: 4 days (range from 4-8 days)                                                        |
| Bernheim A 2020 | January 18 to February 2 | Hospitals from four provinces in China: Nanchang (Jiangxi Province), Zhuhai (Guangdong Province), Chengdu (Sichuan province) and Guilin (Guangxi province) | Mean 45 ± 15,6                            | 102 (61:41)            | Bronchoalveolar lavage, endotracheal aspirate, nasopharyngeal swab, or oropharyngeal swab | Sansure Biotech Inc. (Changsha, China), Shanghai Zhijiang Biotechnology Co. (Shanghai, China), or Da An Gene Co. (Guangzhou, China). | Range to 0 to 12                                | Not reported                                                                                |
| Fang Y 2020     | January 19 to February 4 | Taizhou Enze Medical Center (Group) Enze Hospital                                                                                                          | Median 45<br>Interquartile range of 39-55 | 51 (29:22)             | Throat swab, sputum                                                                       | Not reported                                                                                                                         | Mean 3±3                                        | Repeat testing was performed at intervals of 1 day or more; no further information provided |
| Long C 2020     | January 20 to February 8 | Yichang Yiling Hospital                                                                                                                                    | Mean 44,8<br>±18,2                        | 36 (20:16)             | Not reported                                                                              | Not reported                                                                                                                         | Only duration of fever reported: 2,6 ± 1,7 days | Range from 2 to 8 days                                                                      |
| Xie X 2020      | January 16 to February 2 | Database of Radiology Quality Control Centre, Hunan/ 3 cities in Hunan Province, China                                                                     | Not reported                              | 167 (Not reported)     | swab test; no further details provided                                                    | Not reported                                                                                                                         | Not reported                                    | Range from 2 to 8 days                                                                      |

218

219 **Quality of included studies**

220 We applied the QUADAS-II tool to all included studies to reflect critical limitations in the validity of  
221 the findings (Figure 3 and S3 Appendix). The reference standard domain was the most affected by  
222 the potential risk of bias due to the lack of independence between the index test and the  
223 confirmation of cases (repeated RT-PCR testing). Details about the criteria for positivity were not  
224 provided by all included studies, and this domain was judged as under unclear risk and unclear  
225 applicability concerns. In addition, the applicability of patient selection was judged as with great  
226 concerns due to most of the studies selected patients who underwent both RT-PCR and Chest CT,  
227 excluding patients who can be candidates to receive the index test in the current clinical practice.

228

229 **Findings**

230 We analyse information from five studies collecting information from 957 patients confirmed to  
231 have SARS-CoV-2 infection and 53 cases with RT-PCR negative findings in their initial assessment  
232 (Figure 4). False-negative proportions ranged from 0.02 [24] to 0.29 [26]. Only one study provided  
233 subgroup information about time since illness onset to CT scans [25], as a proxy of the time of  
234 symptom evolution, with proportions ranged from 0.15 ( $\leq 2$  days) to 0.08 (3 or more days) (Figure  
235 4).

236 The pooled estimation of false-negative proportion was 0.085 (95% CI 0.034 to 0.196) estimated by  
237 a mixed-effects logistic regression model. However, pooled data is affected by a considerable  
238 between-study heterogeneity ( $\tau^2 = 1.08$ ; 95% CI= 0.27 to 8.28;  $p < 0.001$ ), since we are not  
239 able to warrant that the average estimation provided by the meta-analysis is a valid and  
240 representative estimation of the true value of the false-negative proportion in the current practice,  
241 we instead used the range of proportions in the analysis of the certainty of the evidence using the  
242 GRADE approach. A full exploration of heterogeneity was not possible given that: a) most of the

243 studies collected upper or lower respiratory specimens; b) all studies included patients with clinical  
244 findings suggestive of COVID 19 disease; c) subgroup information by the time of evolution of  
245 symptom was only provided by one study; and d) key information about the characteristics of the  
246 index test, such as positivity criteria, were not reported. The high variability of pooled estimation  
247 was not reduced with the separate estimation of false-negative proportion by type of study  
248 (accuracy versus case series).

249

### 250 **Certainty of the evidence**

251 We use the range of false-negative proportions to develop a summary of findings following the  
252 GRADE approach. The quality of the evidence was judged to be very low due to issues related to the  
253 risk of bias, indirectness, and inconsistency (Figure 5). We illustrate the consequences of the range  
254 of false-negative proportions in a population of 100 tested, according to three different prevalence  
255 seen in the current clinical practice for participant stakeholders (30%, 50%, and 80%) (Figure 5).  
256 Using a prevalence of 50%, we found that 1 to 14 cases would be misdiagnosed and then they could  
257 no receive adequate clinical management, and they could require repeated testing at some point of  
258 their hospitalization or even they could require other investigations for competitive diagnoses. This  
259 numerical approach should be interpreted with caution due to the multiple limitations of the  
260 evidence described above (Figure 5).

261

### 262 **DISCUSSION**

263 Our systematic review included five studies and 957 participants providing information about the  
264 proportion of false-negative cases related to the detection of SARS-CoV-2 by RT-PCR assays at first  
265 use. The included studies enrolled patients under suspicion of COVID 19 [24, 26, 27] or confirmed  
266 COVID 19 cases [25, 28]. Almost all studies enrolled a selected sample of patients (i.e. patients with

267 findings for RT-PCR and chest CT) from several provinces of China and collected between January to  
268 February 2020. We considered all studies to be affected by several sources of bias, especially related  
269 to the independence between the index test and the reference standard and the unclear report of  
270 key RT-PCR characteristics. A meta-analysis of the proportions using Stata® showed a considerable  
271 heterogeneity not explained by the collected data, and this variability is a limitation for the full  
272 interpretation of averaged proportion. As an alternative, we preferred to provide an analysis of the  
273 range of false-negative proportions derived from included studies in a cohort of 100 patients tested  
274 and using three different prevalence of the disease derived from the current clinical practice of our  
275 participant stakeholders. Using a prevalence of 80%, we found that 2 to 23 cases would be  
276 misdiagnosed and then they could not receive adequate clinical management. However, we  
277 emphasized that this numerical approach should be interpreted with caution due to the multiple  
278 limitations of the evidence described above (Quality of evidence: Very low).

279 Although we did not impose restrictions on population characteristics such as age, setting or  
280 publication status, we noticed that our findings are limited due to all the studies were performed in  
281 one country (China), and they reported data only for the beginning of the pandemic (January 2020),  
282 in addition to the lack of reporting about the index test previously mentioned. RT-PCR kits in use for  
283 included studies were likely the first kits developed by detection of SARS-CoV-2, and then the tests  
284 currently in use might have a great technological evolution and different characteristics to those  
285 of the initial tools.

286

287 Despite the scarcity of information to answer the review question, our study carried out a  
288 comprehensive literature search to identify all relevant studies, including several sources of  
289 unpublished literature such as pre-print repositories. Our assessment also includes a rigorous  
290 assessment of potential sources of bias, a formal statistical analysis of results and a final assessment

291 of the certainty of the evidence under a well-known system (GRADE). We applied selected methods  
292 associated with rapid reviews to streamline the review process, such as the involvement of  
293 stakeholders in the development of the review, a non-independent verification of data selection  
294 and extraction, and parallelisation of tasks (that is, to conduct selected activities simultaneously  
295 instead of consecutively) [29]. We avoided the use of methods that potentially might affect the  
296 quality of the review process, such as those related to limiting the search strategies, the omission  
297 of quality assessment of the collected evidence and the narrative synthesis of results [29, 30].  
298 Due to the permanent involvement of clinicians managing COVID 19 patients in the development of  
299 this review, we were able to define a review question that responds to a clinical inquiry relevant to  
300 current clinical practice [31-33]. In fact, the number of cases misdiagnosed as not having the target  
301 condition is a critical figure due to the severe consequences of not treatment of missing patients.  
302 This estimation also can help in the estimation of additional resources in the current clinical  
303 practices to confirm a suspicious case.

304

### 305 **Implications for practice**

306 Our findings reinforce the need for repeated testing in patients with suspicion of being infected, due  
307 to either clinical or epidemiological reasons, given that up to 29% of patients may have an initial  
308 negative RT-PCR (certainty of evidence: very low). The collected evidence has several limitations in  
309 terms of risk of bias and applicability; in addition, lack of reporting of several key factors remains a  
310 significant constraint for analysis of collected data. A false negative result during the recovering  
311 phase could have important implications for isolation and risk of transmission, although this risk is  
312 reduced by the documentation of at least two negative samples before the discharge. A consequent  
313 positive result could also be erroneously considered as reinfection. An update of this review when  
314 new studies would be available is warranted.



315 **Implications for research**

316 Due to the multiple difficulties associated with the lack of reporting of included studies, and due to  
317 the high probability of new studies being published in the short-term, we provided some  
318 recommendations for future studies candidates to be included in an update of this review:

- 319 • Inclusion of a series of consecutive patients instead of selected groups, to avoid spectrum bias.
- 320 • Inclusion of a series of consecutive patients instead of selected groups, to avoid spectrum bias
- 321 • If samples /specimens are analysed, reporting of information by patient
- 322 • Description of RT-PCR scheme in use, including target genes under assessment and positivity  
323 criteria
- 324 • Description of pre-analytical steps (conservation of samples, time until being sent to the  
325 laboratory, training of personal)
- 326 • Clear reporting of the time since the onset of symptoms, especially for those patients with  
327 clinical findings at admission
- 328 • Reporting of the number of additional RT-PCR assays performed
- 329 • Details about the application of the reference standard, including the time of administration  
330 after the index test (initial RT-PCR)
- 331 • If possible, database sharing could allow re-analyses by independent researchers, including  
332 individual-patient data (IPD)-meta-analysis and increasing thus the confidence on the new  
333 evidence
- 334 • Add serological samples to a cohort of individuals with compatible symptoms and negative PCR  
335 to warrant an independent verification of infection.

336

337

338

339 **DECLARATIONS**

340 **Contributors:** IAR, DBG, DS and JZ conceived the study. IAR, DBG, DSR, RDC, JAPM and JZ designed  
341 the study. IAR, DBG, DSR, PZA screened titles and abstracts for inclusion. IAR, DBG, DSR, PZA, ,AR  
342 and JZ extracted and analysed data. RDC, JAPM, AC, OS and NL assisted in the interpretation from  
343 a clinical viewpoint. IAR, DBG, DSR and JZ wrote the first draft, which all authors revised for critical  
344 content. All authors approved the final manuscript. IAR and JZ are the guarantors. The  
345 corresponding author attests that all listed authors meet authorship criteria and that no others  
346 meeting the criteria have been omitted.

347 **Funding:** Ingrid Arevalo-Rodriguez is funded by the Instituto de Salud Carlos III through the “Acción  
348 Estrategica en Salud 2013-2016 / Contratos Sara Borrell convocatoria 2017/CD17/00219” (Co-  
349 funded by European Social Fund 2014-2020, "Investing in your future").

350 **Competing interests:** All authors declare: no support from any organisation for the submitted work;  
351 no competing interests with regards to the submitted work.

352 **Ethical approval:** Not required.

353 **Data sharing:** The study protocol is available online at <https://tinyurl.com/vvbgqya>. Most included  
354 studies are publically available. Additional data are available upon reasonable request.

355

356

357 **Figure 1. PRISMA flow diagram**

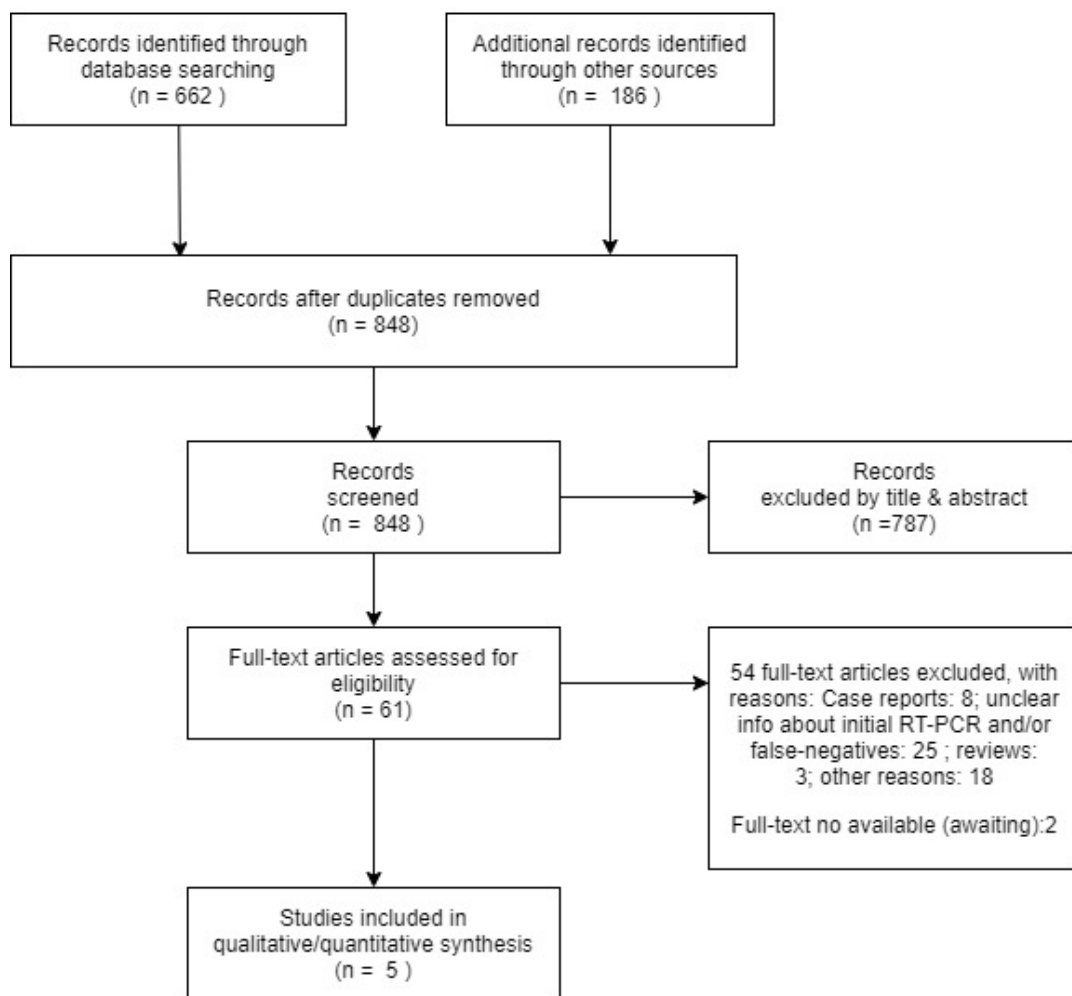

358

359

360 **Figure 2. Setting- included studies**

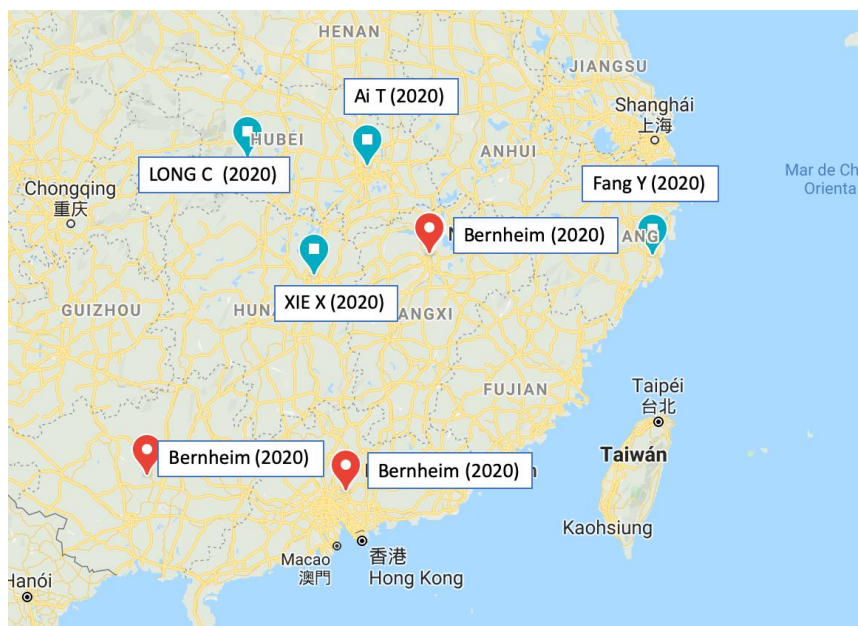

361

362

FINAL DRAFT

363 **Figure 3. Methodological quality- QUADAS-II tool**

|                 | <u>Risk of Bias</u> |            |                    |                 | <u>Applicability Concerns</u> |            |                    |
|-----------------|---------------------|------------|--------------------|-----------------|-------------------------------|------------|--------------------|
|                 | Patient Selection   | Index Test | Reference Standard | Flow and Timing | Patient Selection             | Index Test | Reference Standard |
| Ai T 2020       | +                   | ?          | -                  | +               | -                             | ?          | +                  |
| Bernheim A 2020 | +                   | ?          | -                  | ?               | -                             | ?          | +                  |
| Fang Y 2020     | +                   | ?          | -                  | +               | -                             | ?          | +                  |
| Long C 2020     | -                   | ?          | -                  | +               | -                             | ?          | +                  |
| Xie X 2020      | ?                   | ?          | -                  | +               | ?                             | ?          | +                  |

- High     
 ? Unclear     
 + Low

364

365

366 **Figure 4. Forest plot included studies**

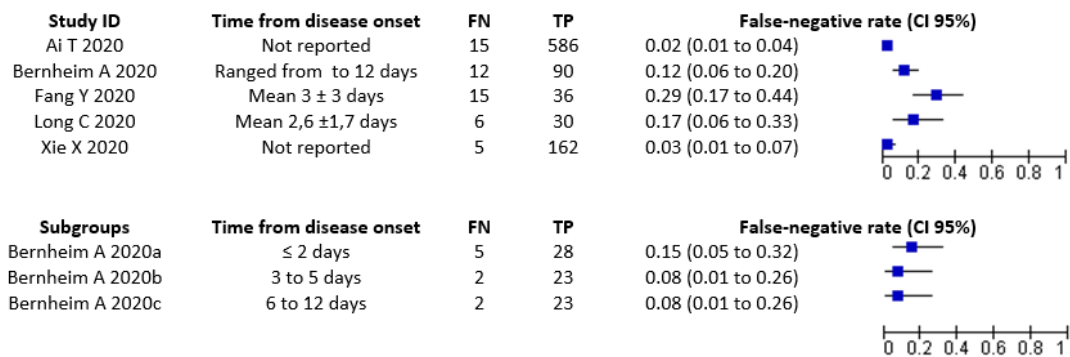

**Note:** Bernheim A 2020 reported time since the symptom onset to CT scan; Long C 2020 reported duration of fever.

367

368

FINAL DRAFT

369 **Figure 5. Certainty of the evidence (GRADE assessment)**

| Proportion:<br>ranged from<br>0.02 to 0.29                                                     | Effect per 100 patient tested       |                                     |                                     | Number of<br>participants<br>(studies) | Certainty of<br>the evidence<br>(GRADE) |
|------------------------------------------------------------------------------------------------|-------------------------------------|-------------------------------------|-------------------------------------|----------------------------------------|-----------------------------------------|
|                                                                                                | Prevalence 30%<br>Typically seen in | Prevalence 50%<br>Typically seen in | Prevalence 80%<br>Typically seen in |                                        |                                         |
| <b>False-negatives</b><br>(patients<br>incorrectly<br>classified as not<br>having COVID-<br>19 | 1 to 9                              | 1 to 14                             | 2 to 23                             | 957 (5<br>studies)                     | ⊕○○○<br>VERY LOW <sup>1,2,3</sup>       |

Notes= 1. Evidence downgraded one level due to risk of bias issues: index test as a part of the reference standard, unclear positivity thresholds for index test; 2. Evidence downgraded one level due to indirectness: selected population enrolled in studies; 3. Evidence downgraded one level due to inconsistency: Tau-square=1.08; 95% CI 0.27 to 8.28; p<0.001.

370

371

FINAL DRAFT

372

## REFERENCES

373

- 374 1. Perrella A, Carannante N, Berretta M, Rinaldi M, Maturo N, Rinaldi L. Novel Coronavirus  
375 2019 (Sars-CoV2): a global emergency that needs new approaches? European review for medical  
376 and pharmacological sciences. 2020;24(4):2162-4. Epub 2020/03/07. doi:  
377 10.26355/eurrev\_202002\_20396. PubMed PMID: 32141586.
- 378 2. Pang J, Wang MX, Ang IYH, Tan SHX, Lewis RF, Chen JI, et al. Potential Rapid Diagnostics,  
379 Vaccine and Therapeutics for 2019 Novel Coronavirus (2019-nCoV): A Systematic Review. J Clin Med.  
380 2020;9(3). doi: 10.3390/jcm9030623. PubMed PMID: 32110875.
- 381 3. Meo SA, Alhowikan AM, Al-Khlaiwi T, Meo IM, Halepoto DM, Iqbal M, et al. Novel  
382 coronavirus 2019-nCoV: prevalence, biological and clinical characteristics comparison with SARS-  
383 CoV and MERS-CoV. European review for medical and pharmacological sciences. 2020;24(4):2012-  
384 9. Epub 2020/03/07. doi: 10.26355/eurrev\_202002\_20379. PubMed PMID: 32141570.
- 385 4. World Health Organization. Coronavirus disease 2019 (COVID-19): Situation Report – 80.  
386 Geneva, Switzerland: 2020.
- 387 5. Huang C, Wang Y, Li X, Ren L, Zhao J, Hu Y, et al. Clinical features of patients infected with  
388 2019 novel coronavirus in Wuhan, China. Lancet. 2020;395(10223):497-506. doi: 10.1016/S0140-  
389 6736(20)30183-5. PubMed PMID: 31986264.
- 390 6. Chen Q, Quan B, Li X, Gao G, Zheng W, Zhang J, et al. A report of clinical diagnosis and  
391 treatment of nine cases of coronavirus disease 2019. J Med Virol. 2020. doi: 10.1002/jmv.25755.  
392 PubMed PMID: 32162699.
- 393 7. Paules CI, Marston HD, Fauci AS. Coronavirus Infections—More Than Just the Common Cold.  
394 JAMA. 2020;323(8):707-8. doi: 10.1001/jama.2020.0757.
- 395 8. Young BE, Ong SWX, Kalimuddin S, Low JG, Tan SY, Loh J, et al. Epidemiologic Features and  
396 Clinical Course of Patients Infected With SARS-CoV-2 in Singapore. JAMA. 2020. doi:  
397 10.1001/jama.2020.3204.
- 398 9. Verity R, Okell LC, Dorigatti I, Winskill P, Whittaker C, Imai N, et al. Estimates of the severity  
399 of coronavirus disease 2019: a model-based analysis. The Lancet Infectious Diseases. doi:  
400 10.1016/S1473-3099(20)30243-7.
- 401 10. Azman AS, Luquero FJ. From China: hope and lessons for COVID-19 control. The Lancet  
402 Infectious Diseases. doi: 10.1016/S1473-3099(20)30264-4.
- 403 11. Zou L, Ruan F, Huang M, Liang L, Huang H, Hong Z, et al. SARS-CoV-2 Viral Load in Upper  
404 Respiratory Specimens of Infected Patients. N Engl J Med. 2020;382(12):1177-9. doi:  
405 10.1056/NEJMc2001737. PubMed PMID: 32074444.
- 406 12. Corman VM, Landt O, Kaiser M, Molenkamp R, Meijer A, Chu DKW, et al. Detection of 2019  
407 novel coronavirus (2019-nCoV) by real-time RT-PCR. Euro surveillance : bulletin Europeen sur les  
408 maladies transmissibles = European communicable disease bulletin. 2020;25(3). Epub 2020/01/30.  
409 doi: 10.2807/1560-7917.es.2020.25.3.2000045. PubMed PMID: 31992387; PubMed Central PMCID:  
410 PMC6988269.
- 411 13. Chu DKW, Pan Y, Cheng SMS, Hui KPY, Krishnan P, Liu Y, et al. Molecular Diagnosis of a Novel  
412 Coronavirus (2019-nCoV) Causing an Outbreak of Pneumonia. Clinical chemistry. 2020;66(4):549-  
413 55. Epub 2020/02/08. doi: 10.1093/clinchem/hvaa029. PubMed PMID: 32031583; PubMed Central  
414 PMCID: PMC6988269.
- 415 14. Lippi G, Simundic AM, Plebani M. Potential preanalytical and analytical vulnerabilities in the  
416 laboratory diagnosis of coronavirus disease 2019 (COVID-19). Clinical chemistry and laboratory  
417 medicine. 2020. Epub 2020/03/17. doi: 10.1515/cclm-2020-0285. PubMed PMID: 32172228.



- 418 15. Organization WH. Laboratory testing for coronavirus disease 2019 (COVID-19) in suspected  
419 human cases. Geneva, Switzerland: 2020 2 March 2020. Report No.: Contract No.: WHO/COVID-  
420 19/laboratory/2020.4.
- 421 16. Li D, Wang D, Dong J, Wang N, Huang H, Xu H, et al. False-Negative Results of Real-Time  
422 Reverse-Transcriptase Polymerase Chain Reaction for Severe Acute Respiratory Syndrome  
423 Coronavirus 2: Role of Deep-Learning-Based CT Diagnosis and Insights from Two Cases. *Korean*  
424 *journal of radiology*. 2020;21(4):505-8. Epub 2020/03/17. doi: 10.3348/kjr.2020.0146. PubMed  
425 PMID: 32174053; PubMed Central PMCID: PMC7082661.
- 426 17. Gostin LO. Public Health Emergency Preparedness: Globalizing Risk, Localizing Threats.  
427 *JAMA*. 2018;320(17):1743-4. doi: 10.1001/jama.2018.16491.
- 428 18. Lin C, Ye R, Xia YL. A meta-analysis to evaluate the effectiveness of real-time PCR for  
429 diagnosing novel coronavirus infections. *Genetics and molecular research : GMR*. 2015;14(4):15634-  
430 41. Epub 2015/12/05. doi: 10.4238/2015.December.1.15. PubMed PMID: 26634531.
- 431 19. Sharfstein JM, Becker SJ, Mello MM. Diagnostic Testing for the Novel Coronavirus. *JAMA*.  
432 2020. doi: 10.1001/jama.2020.3864.
- 433 20. McInnes MDF, Moher D, Thombs BD, McGrath TA, Bossuyt PM, Clifford T, et al. Preferred  
434 reporting items for a systematic review and meta-analysis of diagnostic test accuracy studies: The  
435 PRISMA-DTA statement. *JAMA*. 2018;319(4):338-96.
- 436 21. Whiting PF, Rutjes AW, Westwood ME, Mallett S, Deeks JJ, Reitsma JB, et al. QUADAS-2: a  
437 revised tool for the quality assessment of diagnostic accuracy studies. *Annals of internal medicine*.  
438 2011;155(8):529-36. Epub 2011/10/19. doi: 10.7326/0003-4819-155-8-201110180-00009. PubMed  
439 PMID: 22007046.
- 440 22. Schünemann HJ, Mustafa RA, Brozek J, Steingart KR, Leeflang M, Murad MH, et al. GRADE  
441 guidelines: 21 part 1. Study design, risk of bias and indirectness in rating the certainty across a body  
442 of evidence for test accuracy. *Journal of Clinical Epidemiology*. doi: 10.1016/j.jclinepi.2019.12.020.
- 443 23. Schünemann HJ, Mustafa RA, Brozek J, Steingart KR, Leeflang M, Murad MH, et al. GRADE  
444 guidelines: 21 part 2. Inconsistency, Imprecision, publication bias and other domains for rating the  
445 certainty of evidence for test accuracy and presenting it in evidence profiles and summary of  
446 findings tables. *Journal of Clinical Epidemiology*. doi: 10.1016/j.jclinepi.2019.12.021.
- 447 24. Ai T, Yang Z, Hou H, Zhan C, Chen C, Lv W, et al. Correlation of Chest CT and RT-PCR Testing  
448 in Coronavirus Disease 2019 (COVID-19) in China: A Report of 1014 Cases. *Radiology*. 2020:200642.  
449 doi: 10.1148/radiol.2020200642. PubMed PMID: 32101510.
- 450 25. Bernheim A, Mei X, Huang M, Yang Y, Fayad ZA, Zhang N, et al. Chest CT Findings in  
451 Coronavirus Disease-19 (COVID-19): Relationship to Duration of Infection. *Radiology*. 2020:200463.  
452 doi: 10.1148/radiol.2020200463. PubMed PMID: 32077789.
- 453 26. Fang Y, Zhang H, Xie J, Lin M, Ying L, Pang P, et al. Sensitivity of Chest CT for COVID-19:  
454 Comparison to RT-PCR. *Radiology*. 2020:200432. doi: 10.1148/radiol.2020200432. PubMed PMID:  
455 32073353.
- 456 27. Long C, Xu H, Shen Q, Zhang X, Fan B, Wang C, et al. Diagnosis of the Coronavirus disease  
457 (COVID-19): rRT-PCR or CT? *European journal of radiology*. 2020;126:108961. Epub 2020/04/02. doi:  
458 10.1016/j.ejrad.2020.108961. PubMed PMID: 32229322; PubMed Central PMCID:  
459 PMC7102545.
- 460 28. Xie X, Zhong Z, Zhao W, Zheng C, Wang F, Liu J. Chest CT for Typical 2019-nCoV Pneumonia:  
461 Relationship to Negative RT-PCR Testing. *Radiology*. 2020:200343. doi: 10.1148/radiol.2020200343.  
462 PubMed PMID: 32049601.
- 463 29. Arevalo-Rodriguez I, Moreno-Nunez P, Nussbaumer-Streit B, Steingart K, Gonzalez Peña L,  
464 Buitrago-Garcia D, et al. Rapid reviews of medical tests used many similar methods to systematic

465 reviews but key items were rarely reported: a scoping review. *Journal of Clinical Epidemiology*.  
466 2019;116:98-105.  
467 30. Tricco AC, Antony J, Zarin W, Strifler L, Ghassemi M, Ivory J, et al. A scoping review of rapid  
468 review methods. *BMC medicine*. 2015;13:224. Epub 2015/09/18. doi: 10.1186/s12916-015-0465-6.  
469 PubMed PMID: 26377409; PubMed Central PMCID: PMC4574114.  
470 31. Wilson MG, Lavis JN, Gauvin FP. Developing a rapid-response program for health system  
471 decision-makers in Canada: findings from an issue brief and stakeholder dialogue. *Systematic*  
472 *reviews*. 2015;4:25. Epub 2015/04/16. doi: 10.1186/s13643-015-0009-3. PubMed PMID: 25875495;  
473 PubMed Central PMCID: PMC4373100.  
474 32. Moore G, Redman S, Rudge S, Haynes A. Do policy-makers find commissioned rapid reviews  
475 useful? *Health Res Policy Syst*. 2018;16(1):17. Epub 2018/02/28. doi: 10.1186/s12961-018-0293-1.  
476 PubMed PMID: 29482643; PubMed Central PMCID: PMC5828139.  
477 33. Hartling L, Guise JM, Hempel S, Featherstone R, Mitchell MD, Motu'apuaka ML, et al. Fit for  
478 purpose: perspectives on rapid reviews from end-user interviews. *Systematic reviews*. 2017;6(1):32.  
479 doi: 10.1186/s13643-017-0425-7. PubMed PMID: 28212677; PubMed Central PMCID:  
480 PMC5316162.

481

FINAL DRAFT
